# Supplementary material
Source: publisher figshare collection journal article supplement (https://frontiersin.figshare.com/ndownloader/files/24173792)
Supplement: Supplementary file 1 [file 24173792]

| Table 2. Major and trace element compositions of granites from the Bayan-Ulan pluton | | | | | | | | | |  |  |  |
| --- | --- | --- | --- | --- | --- | --- | --- | --- | --- | --- | --- | --- |
|  |  |  |  |  |  |  |  |  |  |  |  |  |
|  | BU-4 | BU-7 | BU-8 | BU-10 | BU-12 | BU-18 | BU-21 | BU-22 | BU-23 | BU-29 | BU-39 | BU-40 |
| SiO2 (wt.%) | 78.72 | 77.52 | 77.42 | 76.90 | 76.72 | 75.15 | 77.37 | 77.54 | 76.52 | 78.00 | 76.74 | 77.52 |
| TiO2 | 0.09 | 0.09 | 0.10 | 0.16 | 0.17 | 0.17 | 0.13 | 0.13 | 0.11 | 0.14 | 0.12 | 0.12 |
| Al2O3 | 11.60 | 11.93 | 11.84 | 11.77 | 12.30 | 12.24 | 11.74 | 11.98 | 12.64 | 11.80 | 12.12 | 11.67 |
| Fe2O3(t) | 0.72 | 0.68 | 1.37 | 2.34 | 2.05 | 2.03 | 1.32 | 1.70 | 1.00 | 1.90 | 1.19 | 1.69 |
| MnO | 0.04 | 0.01 | 0.02 | 0.02 | 0.01 | 0.02 | 0.01 | 0.01 | 0.00 | 0.01 | 0.03 | 0.02 |
| MgO | 0.01 | 0.01 | 0.01 | 0.01 | 0.01 | 0.02 | 0.01 | 0.01 | 0.01 | 0.01 | 0.01 | 0.01 |
| CaO | 0.07 | 0.19 | 0.09 | 0.05 | 0.06 | 0.12 | 0.20 | 0.17 | 0.24 | 0.09 | 0.17 | 0.19 |
| Na2O | 3.65 | 3.81 | 3.90 | 3.84 | 3.96 | 3.97 | 3.87 | 3.80 | 3.85 | 3.85 | 3.89 | 4.33 |
| K2O | 4.46 | 4.43 | 4.45 | 4.53 | 4.61 | 4.76 | 4.52 | 4.52 | 4.83 | 4.48 | 4.53 | 4.09 |
| P2O5 | 0.01 | 0.01 | 0.02 | 0.02 | 0.02 | 0.02 | 0.01 | 0.01 | 0.02 | 0.02 | 0.02 | 0.01 |
| LOI | 0.39 | 0.30 | 0.30 | 0.40 | 0.39 | 0.67 | 0.49 | 0.48 | 0.30 | 0.30 | 0.30 | 0.30 |
| ∑ | 99.76 | 98.98 | 99.51 | 100.04 | 100.30 | 99.17 | 99.67 | 100.36 | 99.52 | 100.61 | 99.11 | 99.95 |
|  |  |  |  |  |  |  |  |  |  |  |  |  |
|  |  |  |  |  |  |  |  |  |  |  |  |  |
| Ni (ppm) | 3 | 4 | 3 | 4 | 3 | 4 | 4 | 4 | 3 | 4 | 5 | 3 |
| V | 7 | 7 | 7 | 8 | 10 | 10 | 7 | 8 | 7 | 11 | 7 | 7 |
| Cu | 5 | 4 | 4 | 5 | 4 | 4 | 5 | 13 | 4 | 3 | 5 | 5 |
| Zn | 36 | 51 | 69 | 84 | 53 | 105 | 76 | 119 | 43 | 70 | 69 | 75 |
| Rb | 200 | 219 | 237 | 222 | 172 | 182 | 197 | 220 | 231 | 177 | 178 | 169 |
| Ba | 42 | 41 | 33 | 53 | 75 | 106 | 67 | 75 | 64 | 40 | 7 | 3 |
| Sr | 3 | 3 | 2 | 4 | 5 | 11 | 5 | 6 | 7 | 3 | 0 | 0 |
| Ga | 25 | 25 | 25 | 25 | 24 | 24 | 23 | 24 | 23 | 25 | 23 | 24 |
| Nb | 25.1 | 20.3 | 23.6 | 30.5 | 17.9 | 17.2 | 19.2 | 22.9 | 19.8 | 19.1 | 16.5 | 21.0 |
| Zr | 229 | 173 | 212 | 461 | 404 | 424 | 245 | 278 | 168 | 387 | 187 | 280 |
| Y | 53 | 55 | 40 | 82 | 54 | 50 | 66 | 98 | 55 | 47 | 51 | 50 |
| Th | 35.10 | 29.10 | 34.80 | 36.70 | 26.00 | 24.90 | 23.00 | 26.40 | 27.50 | 21.70 | 23.10 | 25.00 |
| La | 68.20 | 51.90 | 27.50 | 54.60 | 33.20 | 31.10 | 69.10 | 138.80 | 41.40 | 32.90 | 58.50 | 48.50 |
| Ce | 114.60 | 99.30 | 64.10 | 141.00 | 203.00 | 71.00 | 135.50 | 224.90 | 90.30 | 91.20 | 123.20 | 120.70 |
|  |  |  |  |  |  |  |  |  |  |  |  |  |
